# Supplementary material for: Photosynthetic performance and stevioside concentration are improved by the arbuscular mycorrhizal symbiosis in Stevia rebaudiana under different phosphate concentrations
Source: PeerJ. 2020 Oct 19;8:e10173. doi: 10.7717/peerj.10173 (PMC7580585; doi:10.7717/peerj.10173)
Supplement: Supplemental Information 5 [file peerj-08-10173-s005.xlsx]

## Sheet: Figure 1. AM colonization
AM colonization with 20 µM KH2PO4								AM colonization with 500 µM KH2PO4
Induvidual plants	P1	P2	P3	P4	P5			Induvidual plants	P1	P2	P3	P4	P5
Total colonization percentage	56.66	42.33	73.33	86.66	62.66			Total colonization percentage	32.66	38.99	40.33	20.33	28.66
Arbuscular percentage	22.66	38.33	53.66	49.66	46.66			Arbuscular percentage	1.134	0.894	2.567	1.222	0.985
AM colonization with 200 µM KH2PO4								AM colonization with 1000 µM KH2PO4
Induvidual plants	P1	P2	P3	P4	P5			Induvidual plants	P1	P2	P3	P4	P5
Total colonization percentage	52.3	58.66	83.33	51.33	40.66			Total colonization percentage	8.333	6.666	7.66	9.33	10.333
Arbuscular percentage	30.22	39.66	62.33	41.33	27.66			Arbuscular percentage	0.5666	0.2333	0.3333	0.4666	0.5333

## Sheet: Figure 3. Leaf and root weight
Leaf fresh weight (g plant-1)
20 µM KH2PO4	P1	P2	P3	P4	P5	P6					Root fresh weight (g plant-1)
M-	0.43	0.7	0.84	0.34	0.35	0.42					20 µM KH2PO4	P1	P2	P3	P4	P5	P6
M+	0.15	0.32	0.39	0.55	0.45	0.41					M-	0.24	0.18	0.32	0.25	0.12	0.18
200 µM KH2PO4	P1	P2	P3	P4	P5	P6					M+	0.16	0.22	0.31	0.26	0.17	0.19
M-	0.69	0.36	0.64	0.45	0.32	0.45					200 µM KH2PO4	P1	P2	P3	P4	P5	P6
M+	0.54	0.9	0.86	0.89	1.02	0.98					M-	0.21	0.12	0.15	0.23	0.24	0.18
500 µM KH2PO4	P1	P2	P3	P4	P5	P6					M+	0.43	0.49	0.31	0.26	0.55	0.39
M-	0.28	0.16	0.39	0.15	0.74	0.31					500 µM KH2PO4	P1	P2	P3	P4	P5	P6
M+	0.38	0.26	0.44	0.87	0.58	0.36					M-	0.22	0.32	0.19	0.27	0.29	0.27
1000 µM KH2PO4	P1	P2	P3	P4	P5	P6					M+	0.28	0.22	0.29	0.24	0.22	0.3
M-	0.57	1.15	0.76	1.01	0.99	0.88					1000 µM KH2PO4	P1	P2	P3	P4	P5	P6
M+	0.92	0.83	0.77	0.83	0.63	0.65					M-	0.39	0.43	0.37	0.33	0.35	0.29
											M+	0.45	0.39	0.42	0.28	0.49	0.37

## Sheet: Figure 4. P and Mg concentratio
P percentage by EDX							Leaf fresh weight						P percentage per plant
20 µM KH2PO4	P1	P2	P3	P4	P5	P6	P1	P2	P3	P4	P5	P6	P1	P2	P3	P4	P5	P6
M-	0.02	0.01	0.03	0.01	0.02	0.01	0.43	0.7	0.84	0.34	0.35	0.42	0.0086	0.007	0.0252	0.0034	0.007	0.0042
M+	0.04	0.02	0.03	0.05	0.06	0.02	0.15	0.32	0.39	0.55	0.45	0.41	0.006	0.0064	0.0117	0.0275	0.027	0.0082
200 µM KH2PO4	P1	P2	P3	P4	P5	P6	P1	P2	P3	P4	P5	P6	P1	P2	P3	P4	P5	P6
M-	0.04	0.04	0.02	0.03	0.02	0.03	0.69	0.36	0.64	0.45	0.32	0.45	0.0276	0.0144	0.0128	0.0135	0.0064	0.0135
M+	0.04	0.05	0.06	0.06	0.08	0.06	0.54	0.9	0.86	0.89	1.02	0.98	0.0216	0.045	0.0516	0.0534	0.0816	0.0588
500 µM KH2PO4	P1	P2	P3	P4	P5	P6	P1	P2	P3	P4	P5	P6	P1	P2	P3	P4	P5	P6
M-	0.09	0.28	0.11	0.22	0.04	0.16	0.28	0.16	0.39	0.15	0.74	0.31	0.0252	0.0448	0.0429	0.033	0.0296	0.0496
M+	0.04	0.03	0.05	0.04	0.03	0.05	0.38	0.26	0.44	0.87	0.58	0.36	0.0152	0.0078	0.022	0.0348	0.0174	0.018
1000 µM KH2PO4	P1	P2	P3	P4	P5	P6	P1	P2	P3	P4	P5	P6	P1	P2	P3	P4	P5	P6
M-	0.08	0.06	0.09	0.11	0.12	0.07	0.57	1.15	0.76	1.01	0.99	0.88	0.0456	0.069	0.0684	0.1111	0.1188	0.0616
M+	0.1	0.11	0.12	0.09	0.08	0.11	0.92	0.83	0.77	0.83	0.63	0.65	0.092	0.0913	0.0924	0.0747	0.0504	0.0715
Mg percentage by EDX							Leaf fresh weight						Mg percentage per plant
20 µM KH2PO4	P1	P2	P3	P4	P5	P6	P1	P2	P3	P4	P5	P6	P1	P2	P3	P4	P5	P6
M-	0.09	0.05	0.04	0.11	0.05	0.04	0.43	0.7	0.84	0.34	0.35	0.42	0.0387	0.035	0.0336	0.0374	0.0175	0.0168
M+	0.35	0.18	0.18	0.1	0.12	0.15	0.15	0.32	0.39	0.55	0.45	0.41	0.0525	0.0576	0.0702	0.055	0.054	0.0615
200 µM KH2PO4	P1	P2	P3	P4	P5	P6	P1	P2	P3	P4	P5	P6	P1	P2	P3	P4	P5	P6
M-	0.03	0.11	0.12	0.09	0.11	0.06	0.69	0.36	0.64	0.45	0.32	0.45	0.0207	0.0396	0.0768	0.0405	0.0352	0.027
M+	0.23	0.1	0.09	0.07	0.08	0.1	0.42	0.9	0.86	0.89	1.02	0.98	0.0966	0.09	0.0774	0.0623	0.0816	0.098
500 µM KH2PO4	P1	P2	P3	P4	P5	P6	P1	P2	P3	P4	P5	P6	P1	P2	P3	P4	P5	P6
M-	0.37	0.42	0.29	0.45	0.14	0.31	0.28	0.16	0.39	0.15	0.74	0.31	0.1036	0.0672	0.1131	0.0675	0.1036	0.0961
M+	0.15	0.07	0.11	0.08	0.09	0.07	0.38	0.26	0.44	0.87	0.58	0.36	0.057	0.0182	0.0484	0.0696	0.0522	0.0252
1000 µM KH2PO4	P1	P2	P3	P4	P5	P6	P1	P2	P3	P4	P5	P6	P1	P2	P3	P4	P5	P6
M-	0.22	0.1	0.14	0.11	0.13	0.13	0.57	1.15	0.76	1.01	0.99	0.88	0.1254	0.115	0.1064	0.1111	0.1287	0.1144
M+	0.09	0.12	0.11	0.09	0.11	0.11	0.92	0.83	0.77	0.83	0.63	0.65	0.0828	0.0996	0.0847	0.0747	0.0693	0.0715

## Sheet: Figure 5. Photosynthetic perfor
(Fv/Fm)										(Fv/Fo)
20 µM KH2PO4	P1	P2	P3	P4	P5	P6				20 µM KH2PO4	P1	P2	P3	P4	P5	P6
M-	0.787815	0.752868	0.75823	0.773196	0.787368	0.78				M-	3.71287	3.04641	3.13617	3.40909	3.70297	3.54545
M+	0.800995	0.831867	0.835735	0.837607	0.816425	0.837452				M+	4.025	4.94767	5.08772	5.15789	4.44737	5.15205
200 µM KH2PO4	P1	P2	P3	P4	P5	P6				200 µM KH2PO4	P1	P2	P3	P4	P5	P6
M-	0.760259	0.756989	0.754757	0.760428	0.749458	0.750799				M-	3.17117	3.11504	3.07759	3.17411	2.99134	3.01282
M+	0.80814	0.809145	0.801377	0.809191	0.822097	0.814462				M+	4.21212	4.23958	4.03465	4.24084	4.62105	4.38974
500 µM KH2PO4	P1	P2	P3	P4	P5	P6				500 µM KH2PO4	P1	P2	P3	P4	P5	P6
M-	0.79085	0.789417	0.789418	0.785027	0.8125	0.798371				M-	3.78125	3.74872	3.74874	3.65174	4.33333	3.9596
M+	0.796407	0.80139	0.790307	0.812563	0.80995	0.8				M+	3.91176	4.035	3.76887	4.33514	4.26178	4
1000 µM KH2PO4	P1	P2	P3	P4	P5	P6				1000 µM KH2PO4	P1	P2	P3	P4	P5	P6
M-	0.791152	0.790586	0.779894	0.77734	0.798611	0.792766				M-	3.78818	3.77523	3.54327	3.49115	3.96552	3.82547
M+	0.784878	0.778493	0.785092	0.782908	0.789827	0.792614				M+	3.64854	3.51452	3.65315	3.60633	3.75799	3.82192
Total chlorophyll										Carotenoids
20 µM KH2PO4	P1	P2	P3	P4	P5	P6				20 µM KH2PO4	P1	P2	P3	P4	P5	P6
M-	0.928343	1.23388	0.983743	0.898473	0.892421	0.993878				M-	0.793874	0.796256	0.80517	0.726377	0.588388	0.346376
M+	1.49298	1.69875	1.49277	1.28478	1.52346	1.12445				M+	1.18749	1.29488	1.48739	1.12773	1.23784	1.38738
200 µM KH2PO4	P1	P2	P3	P4	P5	P6				200 µM KH2PO4	P1	P2	P3	P4	P5	P6
M-	0.834948	0.937438	0.837462	0.937463	0.927365	1.02385				M-	0.59833	0.883878	0.932874	0.728637	0.776328	0.682738
M+	1.39839	1.45899	1.29488	1.58784	1.47233	1.62984				M+	0.876766	1.23466	1.24557	1.88756	1.47837	1.39848
500 µM KH2PO4	P1	P2	P3	P4	P5	P6				500 µM KH2PO4	P1	P2	P3	P4	P5	P6
M-	0.837477	0.937762	0.874235	0.726165	1.24476	0.978637				M-	0.838648	0.354536	0.865542	0.254477	0.754544	0.265435
M+	0.836792	1.18726	0.836547	0.976544	1.09838	1.18365				M+	0.837762	0.736463	0.638479	0.687388	0.733994	0.745829
1000 µM KH2PO4	P1	P2	P3	P4	P5	P6				1000 µM KH2PO4	P1	P2	P3	P4	P5	P6
M-	0.872816	0.782736	0.983647	0.987776	0.837468	0.976663				M-	0.376576	0.765465	0.343888	0.765365	0.692839	0.635726
M+	0.983774	1.09373	0.736492	0.968749	0.938827	1.13246				M+	0.929438	0.756747	0.795787	0.684876	0.446736	0.36499

## Sheet: Figure 6. Biosynthetic genes
No.	200 um	Ct	Ct gdph	Ct KO	Ct KO	KO-gdph
1	M-1	19.44	19.72	19.6	19.4067	-0.313333	1.24258			2-DDCT-KO
2		19.92		19.45					-1.23748	2.35786
3		19.8		19.17					-1.77703	3.4272
1	M-2	22.56	22.5233	21.25	21.6833	-0.84	1.79005		-1.80576	3.49613	3.09373	0.638213
2		22.67		21.56
3		22.34		22.24
1	M-3	25.56	25.8933	24.56	25.03	-0.863333	1.81924
2		26.23		25.89
3		25.89		24.64
1	M+1	18.98	19.1033	26.53	26.72	7.61667	0.00509513
2		18.46		26.87
3		19.87		26.76
1	M+2	21.97	21.9133	28.34	28.1767	6.26333	0.0130181
2		22.34		28.24			1
3		21.43		27.95			1
1	M+3	24.46	24.12	30.45	30.3333	6.21333	0.0134772
2		23.78		29.57
3		24.12		30.98
	1000 um									2-DDCT-KO
1	M-1	19.36	19.45	20.22	20.6133	1.16333	0.44648		0.388608	0.763866
2		19.34		20.97					-0.0337756	1.02369
3		19.65		20.65					0.421153	0.746827	0.844794	0.155161
1	M-2	20.45	20.5133	20.87	20.86	0.346667	0.786399
2		20.76		20.95
3		20.33		20.76
1	M-3	24.45	24.3767	24.67	24.8567	0.48	0.716978
2		24.12		24.89
3		24.56		25.01
1	M+1	20.23	19.82	20.34	20.08	0.26	0.835088
2		19.67		20.45
3		19.56		19.45
1	M+2	21.43	21.4233	21.65	21.8333	0.41	0.752623
2		21.87		22.2
3		20.97		21.65
1	M+3	24.1	24.37	24.4	24.1833	-0.186667	1.13813
2		24.23		23.9
3		24.78		24.25
No.	200 um	Ct	Ct gdph	Ct 74G	Ct 74G	74G-gdph
1	M-1	22.34	22.3867	22.38	22.4167	0.03	0.97942
2		21.92		22.46						2DDCT-74G1
3		22.9		22.41					-0.348003	1.2728
1	M-2	23.32	23.38	23.44	23.41	0.03	0.97942		-0.18572	1.13738
2		23.88		23.41					-0.416845	1.335	1.2484	0.101045
3		22.94		23.38
1	M-3	24.57	24.69	24.61	24.8333	0.143333	0.905425
2		24.6		25.97
3		24.9		23.92
1	M+1	24.88	24.6	25.16	25.2633	0.663333	0.631418
2		24.36		25.39
3		24.56		25.24
1	M+2	25.57	25.82	25.98	26.1533	0.333333	0.793701
2		25.67		26.15			1
3		26.22		26.33			1
1	M+3	27.79	27.4833	28.34	28.5167	1.03333	0.48858
2		27.34		28.25
3		27.32		28.96
	1000 um									2DDCT-74G1
1	M-1	22.56	22.9267	20.22	20.7867	-2.14	4.40762		1.86905	0.273753
2		23.24		21.2					0.994605	0.501873
3		22.98		20.94					1.10805	0.463919	0.413182	0.122231
1	M-2	23.45	23.4167	20.78	21.0433	-2.37333	5.18137
2		23.22		21.23
3		23.58		21.12
1	M-3	25.34	25.1533	22.23	22.45	-2.70333	6.51305
2		24.45		22.56
3		25.67		22.56
1	M+1	21.54	21.8467	19.21	19.1967	-2.65	6.27667
2		22.11		19.45
3		21.89		18.93
1	M+2	23.35	23.6833	20.72	21.0567	-2.62667	6.17597
2		24.15		20.67
3		23.55		21.78
1	M+3	25.56	25.7033	22.35	22.7733	-2.93	7.6211
2		26.2		23.1
3		25.35		22.87
No.	200 um	Ct	Ct gdph	Ct 76G1	Ct 76G1	76G1-gdph				2-DDCT-76G1
1	M-1	19.87	20.2233	20.55	20.7067	0.483333	0.715323		1.05008	0.48294
2		20.25		20.89					0.71654	0.608555
3		20.55		20.68					0.708385	0.612005	0.567833	0.0735398
1	M-2	22.4	22.4033	22.6	22.5367	0.133333	0.911722
2		22.25		22.34
3		22.56		22.67
1	M-3	26.45	26.22	27.34	27.2033	0.983333	0.50581
2		26.25		27.4
3		25.96		26.87
1	M+1	20.45	20.2267	19.42	19.4067	-0.82	1.76541
2		20.34		19.2
3		19.89		19.6
1	M+2	22.8	22.8533	22.4	22.15	-0.703333	1.62826
2		22.98		21.9			1
3		22.78		22.15			1
1	M+3	24.65	24.9933	24.5	24.7133	-0.28	1.21419
2		25.45		25.1
3		24.88		24.54
	1000 um									2-DDCT-76G1
1	M-1	20.45	20.1833	20.75	20.56	0.376667	0.770215		0.0983264	0.934116
2		20.25		20.5					0.0751286	0.949257
3		19.85		20.43					-0.298664	1.23001	1.03779	0.166633
1	M-2	21.56	21.8533	21.97	22.2567	0.403333	0.756109
2		22.04		22.5
3		21.96		22.3
1	M-3	25.35	25.3333	25.8	26.0667	0.733333	0.601513
2		24.98		25.7
3		25.67		26.7
1	M+1	20.65	20.3767	20.9	20.58	0.203333	0.868541
2		20.35		20.5
3		20.13		20.34
1	M+2	22.56	22.3867	22.66	22.6533	0.266667	0.831238
2		22.7		22.9
3		21.9		22.4
1	M+3	24.56	25.0433	26.7	26.7667	1.72333	0.302848
2		25.67		26.93
3		24.9		26.67

## Sheet: Figure 7. Steviol glucosides 
	Stevioside (mg g DW-1)
	200 µM KH2PO4	P1	P2	P3	P4	P5	P6
	M-	3.34	2.45	4.1	3.2	1.89	2.3
	M+	6.78	4.23	7.56	5.68	4.67	7.67
	1000 µM KH2PO4	P1	P2	P3	P4	P5	P6
	M-	8.4	4.95	6.45	8.34	5.4	6.6
	M+	6.5	6.66	4.3	4.6	8.6	6.7
	Rebaudioside A (mg g DW-1)
	200 µM KH2PO4	P1	P2	P3	P4	P5	P6
	M-	10.35	5.56	9.46	8.4	5.54	8.56
	M+	3.4	4.5	3.8	3.2	4.5	1.6
	1000 µM KH2PO4	P1	P2	P3	P4	P5	P6
	M-	2.8	6.3	4.1	5.7	4.5	4.45
	M+	3.56	5.35	4.6	4.2	1.9	4.12

## Sheet: FIGS1. FOLIAR AREA
	Foliar area (mm2)
	20 µM KH2PO4	P1	P2	P3	P4	P5	P6
	M-	115	176.2	165.3	193.5	185.6	165.3
	M+	210.1	190.4	211.3	203.5	201.6	210.6
	200 µM KH2PO4	P1	P2	P3	P4	P5	P6
	M-	140.4	156.5	168	143.2	145.6	150.7
	M+	215.4	220.4	195.4	202.6	206.5	182.4
	500 µM KH2PO4	P1	P2	P3	P4	P5	P6
	M-	212.5	222.2	198.5	219	192.4	202.5
	M+	143	139.7	142.5	137.8	152.5	146.5
	1000 µM KH2PO4	P1	P2	P3	P4	P5	P6
	M-	134.7	122.5	150.5	145.3	156.7	142
	M+	135.5	142	156	145	138	165
	Total Leaves number
	20 µM KH2PO4	P1	P2	P3	P4	P5	P6
	M-	15	16	15	16	13	14
	M+	15	14	17	16	18	18
	200 µM KH2PO4	P1	P2	P3	P4	P5	P6
	M-	14	13	13	14	15	14
	M+	18	17	18	19	17	20
	500 µM KH2PO4	P1	P2	P3	P4	P5	P6
	M-	13	15	16	17	14	16
	M+	11	12	12	14	16	12
	1000 µM KH2PO4	P1	P2	P3	P4	P5	P6
	M-	14	15	16	14	13	16
	M+	15	14	16	15	17	18

## Sheet: FIGS.3
	Fo										Fm
	20 µM KH2PO4	P1	P2	P3	P4	P5	P6				20 µM KH2PO4	P1	P2	P3	P4	P5	P6
	M-	202	237	235	220	202	220				M-	952	959	972	970	950	1000
	M+	200	172	171	171	190	171				M+	1005	1023	1041	1053	1035	1052
	200 µM KH2PO4	P1	P2	P3	P4	P5	P6				200 µM KH2PO4	P1	P2	P3	P4	P5	P6
	M-	222	226	232	224	231	234				M-	926	930	946	935	922	939
	M+	198	192	202	191	190	195				M+	1032	1006	1017	1001	1068	1051
	500 µM KH2PO4	P1	P2	P3	P4	P5	P6				500 µM KH2PO4	P1	P2	P3	P4	P5	P6
	M-	192	195	199	201	192	198				M-	918	926	945	935	1024	982
	M+	204	200	212	185	191	196				M+	1002	1007	1011	987	1005	980
	1000 µM KH2PO4	P1	P2	P3	P4	P5	P6				1000 µM KH2PO4	P1	P2	P3	P4	P5	P6
	M-	203	218	208	226	203	212				M-	972	1041	945	1015	1008	1023
	M+	239	241	222	221	219	219				M+	1111	1088	1033	1018	1042	1056
	Fv
	20 µM KH2PO4	P1	P2	P3	P4	P5	P6
	M-	750	722	737	750	748	780
	M+	805	851	870	882	845	881
	200 µM KH2PO4	P1	P2	P3	P4	P5	P6
	M-	704	704	714	711	691	705
	M+	834	814	815	810	878	856
	500 µM KH2PO4	P1	P2	P3	P4	P5	P6
	M-	726	731	746	734	832	784
	M+	798	807	799	802	814	784
	1000 µM KH2PO4	P1	P2	P3	P4	P5	P6
	M-	769	823	737	789	805	811
	M+	872	847	811	797	823	837
