# Supplementary material for: Photosynthetic performance and stevioside concentration are improved by the arbuscular mycorrhizal symbiosis in Stevia rebaudiana under different phosphate concentrations
Source: PeerJ. 2020 Oct 19;8:e10173. doi: 10.7717/peerj.10173 (PMC7580585; doi:10.7717/peerj.10173)
Supplement: Supplemental Information 6 [file peerj-08-10173-s006.xlsx]

## Sheet: Figure 1. AM colonization
AM colonization with 20 µM KH2PO4							AM colonization with 500 µM KH2PO4
Induvidual plants	P1	P2	P3	P4	P5		Induvidual plants	P1	P2	P3	P4	P5
Total colonization percentage	66.33	46.66	88.88	90	74.44		Total colonization percentage	40	42.22	47.77	46.34	42.4
Arbuscular percentage	34.95	63.6645	63.5	55.83	49.0025		Arbuscular percentage	1.36	1.43548	1.62418	1.57556	1.4416
AM colonization with 200 µM KH2PO4							AM colonization with 1000 µM KH2PO4
Induvidual plants	P1	P2	P3	P4	P5		Induvidual plants	P1	P2	P3	P4	P5
Total colonization percentage	58.88	65.55	45.09	97.77	67.77		Total colonization percentage	40	11.11	10	12.2	18.6
Arbuscular percentage	33.6685	40.3285	18.8785	72.5585	42.5485		Arbuscular percentage	0.96	0.26664	0.24	0.2928	0.4464

## Sheet: Figure 3. Leaf and root weight
Leaf fresh weight (g plant-1)									Root fresh weight (g plant-1)
20 µM KH2PO4	P1	P2	P3	P4	P5	P6	P7		20 µM KH2PO4	P1	P2	P3	P4	P5	P6	P7
M-	0.42	0.65	0.69	0.63	0.68	0.68	0.46		M-	0.28	0.35	0.45	0.42	0.44	0.37	0.36
M+	0.59	0.6	0.65	0.64	0.66	0.48	0.64		M+	0.31	0.5	0.56	0.39	0.37	0.5	0.44
200 µM KH2PO4	P1	P2	P3	P4	P5	P6	P7		200 µM KH2PO4	P1	P2	P3	P4	P5	P6	P7
M-	0.43	0.48	0.73	0.55	0.64	0.61	0.66		M-	0.22	0.44	0.35	0.36	0.37	0.31	0.24
M+	0.93	1.05	0.96	1.04	0.99	1.06	1.09		M+	0.62	0.44	0.6	0.49	0.57	0.42	0.57
500 µM KH2PO4	P1	P2	P3	P4	P5	P6	P7		500 µM KH2PO4	P1	P2	P3	P4	P5	P6	P7
M-	0.66	0.54	0.64	0.64	0.82	0.65	0.69		M-	0.36	0.3	0.28	0.42	0.48	0.45	0.39
M+	0.59	0.77	0.59	0.55	0.87	0.56	0.89		M+	0.36	0.51	0.58	0.46	0.44	0.46	0.34
1000 µM KH2PO4	P1	P2	P3	P4	P5	P6	P7		1000 µM KH2PO4	P1	P2	P3	P4	P5	P6	P7
M-	0.73	0.97	0.85	1.31	0.84	0.88	0.96		M-	0.43	0.45	0.4	0.86	0.42	0.38	0.43
M+	1.12	1.11	1.07	1.06	0.98	1.13	0.99		M+	0.76	0.51	0.56	0.72	0.7	0.85	0.8

## Sheet: Figure 4. P and Mg content
P percentage by EDX								Leaf fresh weight							P percentage per plant
20 µM KH2PO4	P1	P2	P3	P4	P5	P6	P7	P1	P2	P3	P4	P5	P6	P7	P1	P2	P3	P4	P5	P6	P7	X	DS
M-	0.02	0.06	0.03	0.01	0.02	0.02	0.02	0.62	0.65	0.69	0.63	0.68	0.68	0.46	0.0124	0.039	0.0207	0.0063	0.0136	0.0136		0.0176	0.0114394
M+	0.07	0.05	0.02	0.03	0.02	0.04	0.02	0.59	0.6	0.65	0.64	0.66	0.28	0.84	0.0413	0.03	0.013	0.0192	0.0132	0.0112		0.0213167	0.0119717
200 µM KH2PO4	P1	P2	P3	P4	P5	P6	P7	P1	P2	P3	P4	P5	P6	P7	P1	P2	P3	P4	P5	P6	P7
M-	0.08	0.06	0.03	0.04	0.02	0.04	0.4	0.43	0.48	0.73	0.55	0.64	0.61	0.66	0.0344	0.0288	0.0219	0.022	0.0128	0.0244		0.02405	0.00728279
M+	0.1	0.09	0.09	0.09	0.09	0.12	0.08	0.93	1.05	0.96	1.04	0.99	1.06	1.09	0.093	0.0945	0.0864	0.0936	0.0891	0.1272		0.0973	0.0149672
500 µM KH2PO4	P1	P2	P3	P4	P5	P6	P7	P1	P2	P3	P4	P5	P6	P7	P1	P2	P3	P4	P5	P6	P7
M-	0.23	0.24	0.22	0.2	0.22	0.19	0.15	0.66	0.54	0.64	0.64	0.82	0.65	0.69	0.1518	0.1296	0.1408	0.128	0.1804	0.1235		0.14235	0.0212759
M+	0.11	0.12	0.15	0.22	0.18	0.13	0.9	0.59	0.77	0.59	0.55	0.87	0.56	0.89	0.0649	0.0924	0.0885	0.121	0.1566	0.0728		0.0993667	0.0340706
1000 µM KH2PO4	P1	P2	P3	P4	P5	P6	P7	P1	P2	P3	P4	P5	P6	P7	P1	P2	P3	P4	P5	P6	P7
M-	0.18	0.2	0.21	0.21	0.22	0.18	0.16	0.73	0.97	0.85	1.31	0.84	0.88	0.96	0.1314	0.194	0.1785	0.2751	0.1848	0.1584		0.187033	0.0485737
M+	0.12	0.19	0.18	0.18	0.15	0.16	0.13	1.12	1.11	1.07	1.06	0.98	1.13	0.99	0.1344	0.2109	0.1926	0.1908	0.147	0.1808		0.176083	0.0293502
Mg percentage by EDX								Leaf fresh weight							Mg percentage per plant
20 µM KH2PO4	P1	P2	P3	P4	P5	P6	P7	P1	P2	P3	P4	P5	P6	P7	P1	P2	P3	P4	P5	P6	P7
M-	0.12	0.11	0.15	0.16	0.11	0.08	0.13	0.62	0.65	0.69	0.63	0.68	0.68	0.46	0.0744	0.0715	0.1035	0.1008	0.0748	0.0544		0.0799	0.0188194
M+	0.21	0.15	0.23	0.29	0.26	0.37	0.15	0.59	0.6	0.65	0.64	0.66	0.28	0.84	0.1239	0.09	0.1495	0.1856	0.1716	0.1036		0.137367	0.0379756
200 µM KH2PO4	P1	P2	P3	P4	P5	P6	P7	P1	P2	P3	P4	P5	P6	P7	P1	P2	P3	P4	P5	P6
M-	0.08	0.17	0.13	0.08	0.15	0.08	0.1	0.43	0.48	0.73	0.55	0.64	0.61	0.66	0.0344	0.0816	0.0949	0.044	0.096	0.0488		0.0666167	0.0274032
M+	0.26	0.22	0.22	0.31	0.21	0.22	0.26	0.93	1.05	0.96	1.04	0.99	1.06	1.09	0.2418	0.231	0.2112	0.3224	0.2079	0.2332		0.24125	0.0418825
500 µM KH2PO4	P1	P2	P3	P4	P5	P6	P7	P1	P2	P3	P4	P5	P6	P7	P1	P2	P3	P4	P5	P6
M-	0.29	0.35	0.27	0.26	0.24	0.28	0.31	0.66	0.54	0.64	0.64	0.82	0.65	0.69	0.1914	0.189	0.1728	0.1664	0.1968	0.182		0.183067	0.0116411
M+	0.22	0.1	0.16	0.22	0.11	0.1	0.17	0.59	0.77	0.59	0.55	0.87	0.56	0.89	0.1298	0.077	0.0944	0.121	0.0957	0.056		0.09565	0.0273143
1000 µM KH2PO4	P1	P2	P3	P4	P5	P6	P7	P1	P2	P3	P4	P5	P6	P7	P1	P2	P3	P4	P5	P6
M-	0.33	0.3	0.29	0.22	0.25	0.32	0.33	0.73	0.97	0.85	1.31	0.84	0.88	0.96	0.2409	0.291	0.2465	0.2882	0.21	0.2816		0.2597	0.0324633
M+	0.17	0.18	0.17	0.15	0.19	0.14	0.17	1.12	1.11	1.07	1.06	0.98	1.13	0.99	0.1904	0.1998	0.1819	0.159	0.1862	0.1582		0.17925	0.0170594

## Sheet: Figure 5. Photosynthetic perfor
	(Fv/Fm)								(Fv/Fo)
	20 µM KH2PO4	P1	P2	P3	P4	P5	P6		20 µM KH2PO4	P1	P2	P3	P4	P5	P6
	M-	0.786	0.7576	0.7621	0.77	0.7791	0.7902		M-	3.67647	3.12554	3.20435	3.34821	3.5283	3.76812
	M+	0.789	0.8274	0.83	0.8271	0.8087	0.8256		M+	3.73953	4.79444	4.88398	4.78495	4.22772	4.73656
	200 µM KH2PO4	P1	P2	P3	P4	P5	P6		200 µM KH2PO4	P1	P2	P3	P4	P5	P6
	M-	0.752	0.7502	0.7492	0.7359	0.7411	0.732		M-	3.03376	3.00424	2.9876	2.78715	2.86364	2.73152
	M+	0.7994	0.8021	0.7779	0.8033	0.8146	0.805		M+	3.98571	4.05419	3.50439	4.08543	4.39604	4.12981
	500 µM KH2PO4	P1	P2	P3	P4	P5	P6		500 µM KH2PO4	P1	P2	P3	P4	P5	P6
	M-	0.791	0.7831	0.7854	0.7767	0.8171	0.7915		M-	3.78571	3.61084	3.66184	3.47867	4.4697	3.79808
	M+	0.7869	0.7789	0.7877	0.7773	0.7768	0.7993		M+	3.69264	3.52321	3.71245	3.49099	3.48052	3.98305
	1000 µM KH2PO4	P1	P2	P3	P4	P5	P6		1000 µM KH2PO4	P1	P2	P3	P4	P5	P6
	M-	0.7903	0.7888	0.7789	0.7789	0.7917	0.7826		M-	3.77073	3.73543	3.52358	3.52381	3.80282	3.6
	M+	0.7784	0.7679	0.7784	0.7795	0.7852	0.7883		M+	3.51406	3.30859	3.51293	3.5368	3.65639	3.72566
	Total chlorophyll								Carotenoids
	20 µM KH2PO4	P1	P2	P3	P4	P5	P6		20 µM KH2PO4	P1	P2	P3	P4	P5	P6
	M-	1.31541	1.4138	1.34328	1.45032	1.28086	1.56499		M-	1.43425	1.64602	1.53762	1.50728	1.34855	1.70036
	M+	2.04468	2.19717	2.01685	1.97278	2.28661	1.74647		M+	2.21845	2.2851	2.06044	2.12514	2.4551	1.80135
	200 µM KH2PO4	P1	P2	P3	P4	P5	P6		200 µM KH2PO4	P1	P2	P3	P4	P5	P6
	M-	0.833484	1.14302	0.978524	1.26089	1.10936	1.31239		M-	0.752743	1.22961	1.0726	1.37633	1.19544	1.41822
	M+	2.04109	2.04374	1.66903	2.05578	1.90578	2.42589		M+	2.22487	2.22077	1.80663	2.25823	2.12897	2.78267
	500 µM KH2PO4	P1	P2	P3	P4	P5	P6		500 µM KH2PO4	P1	P2	P3	P4	P5	P6
	M-	1.4968	1.30911	1.12567	0.764959	1.01674	1.74285		M-	1.6289	1.45885	1.19536	0.741137	1.08485	1.93209
	M+	1.37057	1.46654	1.35108	1.53193	1.64378	1.42804		M+	1.46937	1.51806	1.47374	1.62929	1.68773	1.54608
	1000 µM KH2PO4	P1	P2	P3	P4	P5	P6		1000 µM KH2PO4	P1	P2	P3	P4	P5	P6
	M-	1.22612	1.15354	1.19691	1.35341	1.07546	1.25544		M-	1.4	1.41179	1.47547	1.48748	1.22508	1.45962
	M+	1.08316	1.58722	0.888907	1.08142	1.73512	1.57876		M+	1.25816	1.8226	1.09677	1.55149	2.43357	1.91142

## Sheet: Figure 6. Biosynthetic genes
KO CT data
Name	Ct	Ct KO prom	Ct KO valor	KO-GDPH	POTENCIA (2,-x)	prom 2DCt	DS 2DCt	prom KO-gdph nm			m	nm	DD
M-1, 200	28.8	28.585	28.585	5.88	0.0169802	0.0993723	0.134422	4.16967			DKO-gdph m	Dko-gdph nm	P-Q	POTENCIA 2ΔΔCT	2-ΔΔCT KO 200
	29									m1	2.84167	5.88	-3.03833	8.21541	7.46584	1.04712
	28.37									m2	1.5225	4.50667	-2.98417	7.91268
M-2, 200	31.75	31.9633	31.9633	4.50667	0.0439904					m3	2.345	4.99333	-2.64833	6.26943
	30.92
	33.22
M-3, 200	28.13	28.5	28.5	4.99333	0.0313947
	29.05
	28.32
M+1, 200	29.85	27.775	27.775	2.84167	0.1395
	27.79
	27.76
M+2, 200	24.91	24.9725	24.9725	1.5225	0.348082
	24.88
	25.22
M+3,200	29.43	29.115	29.115	2.345	0.196827
	28.8
	29.87
M-1, 1000	23.85	24.2267	24.2267	nm11000	27.55	27.9967	27.9967	3.77			m	nm	DD
	24.47				27.57						D76g-gdph m	D76G-gdph nm	P-Q	POTENCIA 2ΔΔCT	2-ΔΔCT KO 1000
	24.36				28.87					M1	4.18333	3.77	0.413333	0.750886	0.890262	0.152627
M-2, 1000	24.13	24.5	24.5	nm21000	27.64	28.1333	28.1333	3.63333		M2	3.55833	3.63333	-0.075	1.05336
	24.5				28.64					M3	3.72	3.51333	0.206667	0.866537
	24.87				28.12
M-3,1000	23.56			nm31000	27.34
	24.15				27.89
	23.66	23.79			26.68	27.3033	3.51333	0.0875752
M+1, 1000	21.94	22.1467	22.1467	m11000	26.44	26.33	26.33	4.18333
	22.21				25.66
	22.29				26.89
M+2, 1000	24.21	24.6433	24.435	m21000	27.29	27.9933	27.9933	3.55833
	24.66				28.75
	25.06				27.94
M+3,1000	23.75			m31000	27.65
	22.95				26.9
	23.94	23.5467			27.25	27.2667	3.72	0.0758872
UGT74G1 CT data
M-1,200	23.52	23.5067	23.5067	23.58	23.5267	23.5267	0.02	0.986233
	23.66			23.65							m	nm	DD
	23.34			23.35							D74g-gdph m	D74g-gdph nm	N-O	POTENCIA 2ΔΔCT	2-ΔΔCT
M-2,200	25.04	24.9133	24.9133	24.59	24.75	24.75	-0.163333	1.11987		M1	-1.27667	-0.215333	-1.06133	2.08686	1.6135	0.409955
	24.8			24.92						M2	-0.68	-0.215333	-0.464667	1.38
	24.9			24.74						M3	-0.673333	-0.215333	-0.458	1.37364
M-3,200	24.99	24.77	24.77	25.15	25.3967	25.3967	0.626667	0.647671
	24.61			25.43
	24.71			25.61
M+1,200	26.77	26.77	26.77	25.43	25.4933	25.4933	-1.27667	2.42279
	26.75			25.24
	26.79			25.81
M+2,200	23.87	24.2067	24.2067	23.53	23.5267	23.5267	-0.68	1.60214
	24.25			23.25
	24.5			23.8
M+3,200	21	20.6133	20.6133	19.7	19.94	19.94	-0.673333	1.59475
	20.26			19.91
	20.58			20.21
M-1,1000	23.85	24.2267	24.2267	20.36	20.5667	20.5667	-3.66	12.6407
	24.47			20.8
	24.36			20.54							m	nm	DD
M-2,1000	24.13	24.5	24.5	20.29	20.5967	20.5967	-3.90333	14.9631			D74g-gdph m	D74g-gdph nm	N-O	POTENCIA 2ΔΔCT	2-ΔΔCT
	24.5			20.67						M1	-2.59	-3.45889	0.868889	0.547568	0.619529	0.101767
	24.87			20.83						M2	-3.87333	-3.45889	-0.414444	1.33279
M-31000	25.65			23.45						M3	-2.92667	-3.45889	0.532222	0.691489
	27.25			24.15
	26.89	26.5967	26.5967	23.75	23.7833	23.7833	-2.81333	7.02907
M+1,1000	21.94	22.1467	22.1467	19.71	19.5567	19.5567	-2.59	6.02099
	22.21			19.85
	22.29			19.11
M+2,1000	24.21	24.6433	24.6433	20.8	20.77	20.77	-3.87333	14.6551
	24.66			21.35
	25.06			20.16
M+3,1000	26.34			23.15
	26.56			22.98
	25.87	26.2567	26.2567	23.86	23.33	23.33	-2.92667	7.60352
UGT76G1 CT data
M-1,200	22.48	22.63	22.63	1	nm1	21.33	21.92	21.92			m	nm	DD
	22.71			2		21.87					D76g-gdph m	D76G-gdph nm	P-Q	POTENCIA 2ΔΔCT	2-ΔΔCT
	22.7			3		22.56				M1	1.13	-0.594	1.724	0.302708	0.344979	0.0429114
M-2,200	23.52	23.5067	23.5067	7	nm3	21.1	21.5833	21.5833		M2	0.77	-0.594	1.364	0.388504
	23.66			8		21.34				M3	0.946667	-0.594	1.54067	0.343727
	23.34			9		22.31
M-3,200	25.04	24.9133	24.9133	10	nm4	25.15	25.3333	25.3333
	24.8			11		25.06
	24.9			12		25.79
M+1,200	25.18	24.9333	24.9333	16	m1	26.17	26.0633	26.0633
	24.66			17		25.91
	24.96			18		26.11
M+2,200	23.87	24.2067	24.2067	25	m4	24.88	25.1533	25.1533
	24.25			26		24.91
	24.5			27		25.67
M+3,200	23.87	24.2067	24.2067	25	m4	24.88	25.1533	25.1533
	24.25			26		24.91
	24.5			27		25.67
M-1, 1000	23.85	24.2267	22.215	31	nm11000	21.85	22.3767	22.3767			m	nm	DD
	24.47			32		22.44					D76g-gdph m	D76G-gdph nm	P-Q	POTENCIA 2ΔΔCT	2-ΔΔCT
	24.36			33		22.84				M11000	-0.0516667	-0.473333	0.421667	0.746562	0.799348	0.160334
M-2, 1000	24.13	24.5	24.415	34	nm21000	23.71	23.6467	23.6467		M21000	0.1	-0.473333	0.573333	0.672062
	24.5			35		23.42					-0.443333	-0.473333	0.03	0.97942
	24.87			36		23.81
M-3,1000	23.34					22.45
	23.56					21.65
	22.89		23.2633			23.25	22.45
M+1,1000	21.94	22.1467	22.1467	37	m11000	19.84	22.095	22.095
	22.21			38		20.6
	22.29			39		20.55
M+2,1000	24.21	24.6433	24.6433	40	m21000	25.35	24.7433	24.7433
	24.66			41		24.01
	25.06			42		24.87
M+3,1000	25.45					25.25
	24.78					24.56
	24.67		24.9667			23.76	24.5233

## Sheet: Figure 7. Steviol glucosides 
Stevioside (mg g plant-1)
200 µM KH2PO4	P1	P2	P3	P4	P5	P6
M-	2.82785	2.60928	3.33796	2.29068	3.82925	3.9
M+	9.5904	3.6406	10.4397	8.44237	10.0992	9.9
1000 µM KH2PO4	P1	P2	P3	P4	P5	P6
M-	5.97656	8.95435	7.92428	10.781	6.64501	5.35224
M+	7.30462	7.7141	4.94299	6.9	4.46618	7.2
Rebaudioside A (mg g plant-1)
200 µM KH2PO4	P1	P2	P3	P4	P5	P6
M-	9.24601	12.6541	11.6	12.4957	13.6	13.8
M+	8.35057	7.7284	6.93272	7.07879	6.93848	6.2
1000 µM KH2PO4	P1	P2	P3	P4	P5	P6
M-	4.37012	6.04722	7.52623	5.64449	5.14618	6.88483
M+	5.74822	8.53306	7.11146	7.7	2.91146	6.9

## Sheet: Fig S1
	Foliar area (mm2)
	20 µM KH2PO4	P1	P2	P3	P4	P5	P6
	M-	83.7	259.1	277.7	234.5	264.2	198.5
	M+	290.8	244.9	314.9	290.8	273.1	284.7
	200 µM KH2PO4	P1	P2	P3	P4	P5	P6
	M-	221.2	206.4	203.7	236	209.8	215.8
	M+	314.1	269	263.8	274.7	295.9	263.5
	500 µM KH2PO4	P1	P2	P3	P4	P5	P6
	M-	317.8	259.6	183.2	350.8	256.7	187.5
	M+	194.7	219.8	145.8	131.6	144	213.9
	1000 µM KH2PO4	P1	P2	P3	P4	P5	P6
	M-	172.2	186.3	188.2	146.5	279.8	205.6
	M+	255.3	260.3	237	260.4	156.3	243.7
	Total Leaves number
	20 µM KH2PO4	P1	P2	P3	P4	P5	P6
	M-	17	19	18	19	17	16
	M+	20	19	19	17	20	19
	200 µM KH2PO4	P1	P2	P3	P4	P5	P6
	M-	16	14	16	16	12	18
	M+	20	20	20	21	19	22
	500 µM KH2PO4	P1	P2	P3	P4	P5	P6
	M-	17	19	18	19	22	18
	M+	21	20	21	20	20	22
	1000 µM KH2PO4	P1	P2	P3	P4	P5	P6
	M-	21	19	17	24	15	18
	M+	20	18	18	20	20	19

## Sheet: Fig S3.
	Fo
	20 µM KH2PO4	P1	P2	P3	P4	P5	P6
	M-	204	231	230	224	212	207
	M+	215	180	181	186	202	186
	200 µM KH2PO4	P1	P2	P3	P4	P5	P6
	M-	237	236	242	249	242	257
	M+	210	203	228	199	202	208
	500 µM KH2PO4	P1	P2	P3	P4	P5	P6
	M-	196	203	207	211	198	208
	M+	231	237	233	222	231	236
	1000 µM KH2PO4	P1	P2	P3	P4	P5	P6
	M-	205	223	212	231	213	225
	M+	249	256	232	231	227	226
	Fm
	20 µM KH2PO4	P1	P2	P3	P4	P5	P6
	M-	954	953	967	974	960	987
	M+	1019	1043	1065	1076	1056	1067
	200 µM KH2PO4	P1	P2	P3	P4	P5	P6
	M-	956	945	965	943	935	959
	M+	1047	1026	1027	1012	1090	1067
	500 µM KH2PO4	P1	P2	P3	P4	P5	P6
	M-	938	936	965	945	1083	998
	M+	1084	1072	1098	997	1035	1176
	1000 µM KH2PO4	P1	P2	P3	P4	P5	P6
	M-	978	1056	959	1045	1023	1035
	M+	1124	1103	1047	1048	1057	1068
	Fv
	20 µM KH2PO4	P1	P2	P3	P4	P5	P6
	M-	750	722	737	750	748	780
	M+	804	863	884	890	854	881
	200 µM KH2PO4	P1	P2	P3	P4	P5	P6
	M-	719	709	723	694	693	702
	M+	837	823	799	813	888	859
	500 µM KH2PO4	P1	P2	P3	P4	P5	P6
	M-	742	733	758	734	885	790
	M+	853	835	865	775	804	940
	1000 µM KH2PO4	P1	P2	P3	P4	P5	P6
	M-	773	833	747	814	810	810
	M+	875	847	815	817	830	842
